# Supplementary material for: Molecular Insights into the Pathogenesis of Alzheimer's Disease and Its Relationship to Normal Aging
Source: PubMed Central journal article supplement (PMC3247273; doi:10.1371/journal.pone.0029610), 2011-12-28

Figure S2

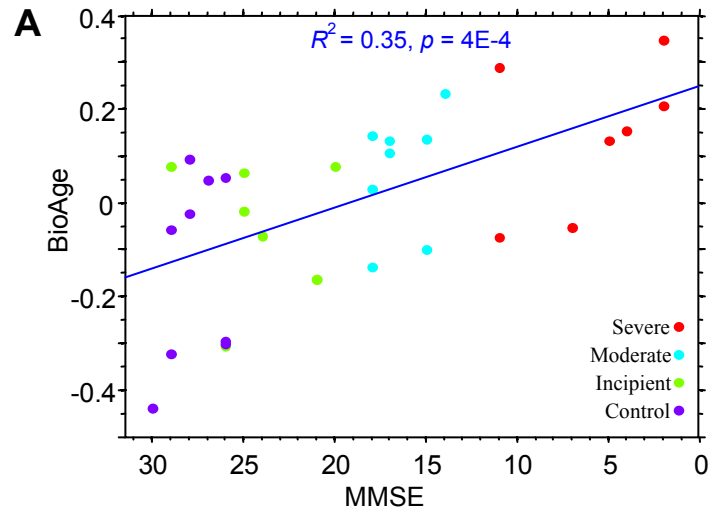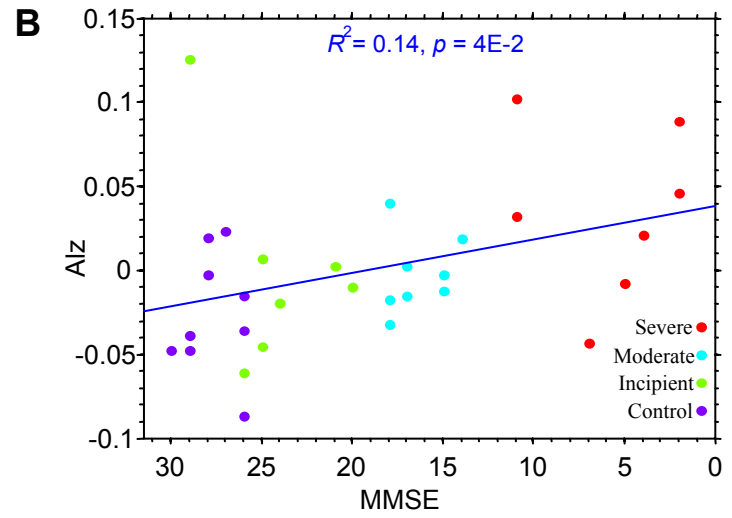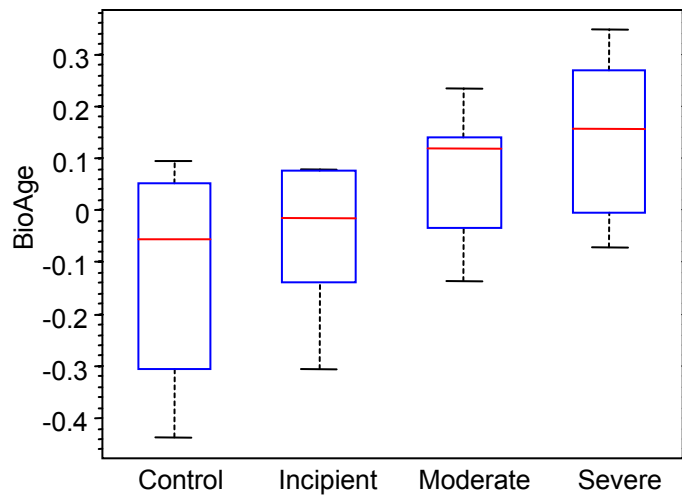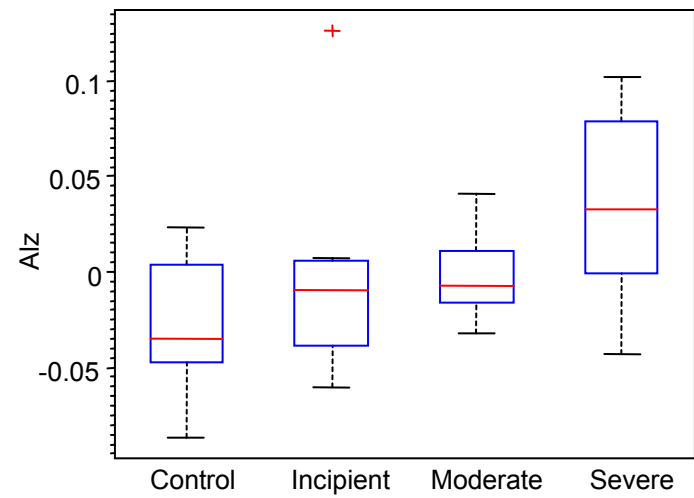

Supplement: pone.0029610.s002.pdf [file pone.0029610.s002.pdf]
