# Supplementary material for: Molecular Insights into the Pathogenesis of Alzheimer's Disease and Its Relationship to Normal Aging
Source: PubMed Central journal article supplement (PMC3247273; doi:10.1371/journal.pone.0029610), 2011-12-28
Supplement: pone.0029610.s007.pdf [file pone.0029610.s007.pdf]

Table S1

| Region, Phase | Diagnosis  | Total | Males | Females | Mean Age | Age Range | Mean PMI | Mean Braak Stage | Mean pH | Mean RIN |
|---------------|------------|-------|-------|---------|----------|-----------|----------|------------------|---------|----------|
| PFC1          | Normal     | 125   | 93    | 32      | 63.8     | 22-106    | 22.2     | 0.6              | 6.4     | 7.2      |
|               | Alzheimer  | 181   | 81    | 100     | 79.7     | 47-100    | 14.5     | 4.9              | 6.2     | 6.7      |
| VC1           | Normal     | 104   | 82    | 22      | 63.5     | 22-106    | 22.4     | 1.5              | 6.4     | 7.0      |
|               | Alzheimer  | 116   | 57    | 59      | 79.7     | 47-100    | 14.1     | 4.4              | 6.3     | 6.7      |
| CR1           | Normal     | 103   | 80    | 23      | 63.3     | 22-106    | 22.0     | 0.5              | 6.5     | 6.6      |
|               | Alzheimer  | 173   | 79    | 94      | 79.8     | 54-100    | 14.9     | 4.9              | 6.4     | 6.5      |
| PFC2          | Normal     | 38    | 30    | 8       | 63.2     | 50-86     | 22.4     | 0.7              | 6.6     | 6.9      |
|               | Alzheimer  | 115   | 41    | 74      | 81.5     | 59-98     | 12.6     | 4.9              | 6.3     | 6.8      |
|               | Huntington | 141   | 74    | 67      | 57.7     | 21-85     | 20.8     | 0.6              | 6.4     | 7.3      |
| VC2           | Normal     | 23    | 18    | 5       | 61.0     | 50-80     | 22.2     | 0.8              | 6.5     | 7.0      |
|               | Alzheimer  | 53    | 18    | 35      | 81.0     | 60-95     | 11.7     | 5.2              | 6.2     | 6.6      |
|               | Huntington | 132   | 65    | 67      | 56.5     | 18-93     | 20.6     | 0.4              | 6.4     | 7.0      |
| CR2           | Normal     | 25    | 20    | 5       | 63.3     | 50-82     | 22.0     | 0.7              | 6.5     | 6.5      |
|               | Alzheimer  | 49    | 17    | 32      | 80.1     | 59-97     | 13.5     | 5.0              | 6.5     | 6.4      |
|               | Huntington | 139   | 72    | 67      | 56.3     | 18-93     | 20.0     | 0.4              | 6.5     | 6.7      |
